# Supplementary material for: DCE-MRI of patient-derived xenograft models of uterine cervix carcinoma: associations with parameters of the tumor microenvironment
Source: PubMed Central journal article supplement (PMC5670634; doi:10.1186/s12967-017-1331-4), 2017-11-03
Supplement: 12967_2017_1331_MOESM1_ESM.pdf [file 12967_2017_1331_MOESM1_ESM.pdf]

**Additional file 1 to:**

**DCE-MRI of patient-derived xenograft models of uterine cervix carcinoma: associations with parameters of the tumor microenvironment**

Anette Hauge<sup>1</sup> – [anette.hauge@rr-research.no](mailto:anette.hauge@rr-research.no)

Catherine S. Wegner<sup>1</sup> – [catherine.sem.wegner@rr-research.no](mailto:catherine.sem.wegner@rr-research.no)

Jon-Vidar Gaustad<sup>1</sup> – [jon.vidar.gaustad@rr-research.no](mailto:jon.vidar.gaustad@rr-research.no)

Trude G. Simonsen<sup>1</sup> – [trude.golimo.simonsen@rr-research.no](mailto:trude.golimo.simonsen@rr-research.no)

Lise Mari K. Andersen<sup>1</sup> – [lise.mari.klepp.andersen@rr-research.no](mailto:lise.mari.klepp.andersen@rr-research.no)

Einar K. Rofstad<sup>1\*</sup> – [einar.k.rofstad@rr-research.no](mailto:einar.k.rofstad@rr-research.no)

<sup>1</sup>Group of Radiation Biology and Tumor Physiology, Department of Radiation Biology,  
Institute for Cancer Research, The Norwegian Radium Hospital, Oslo University Hospital,  
P. O. Box 4953 Nydalen, N-0424 Oslo, Norway

\*Corresponding author

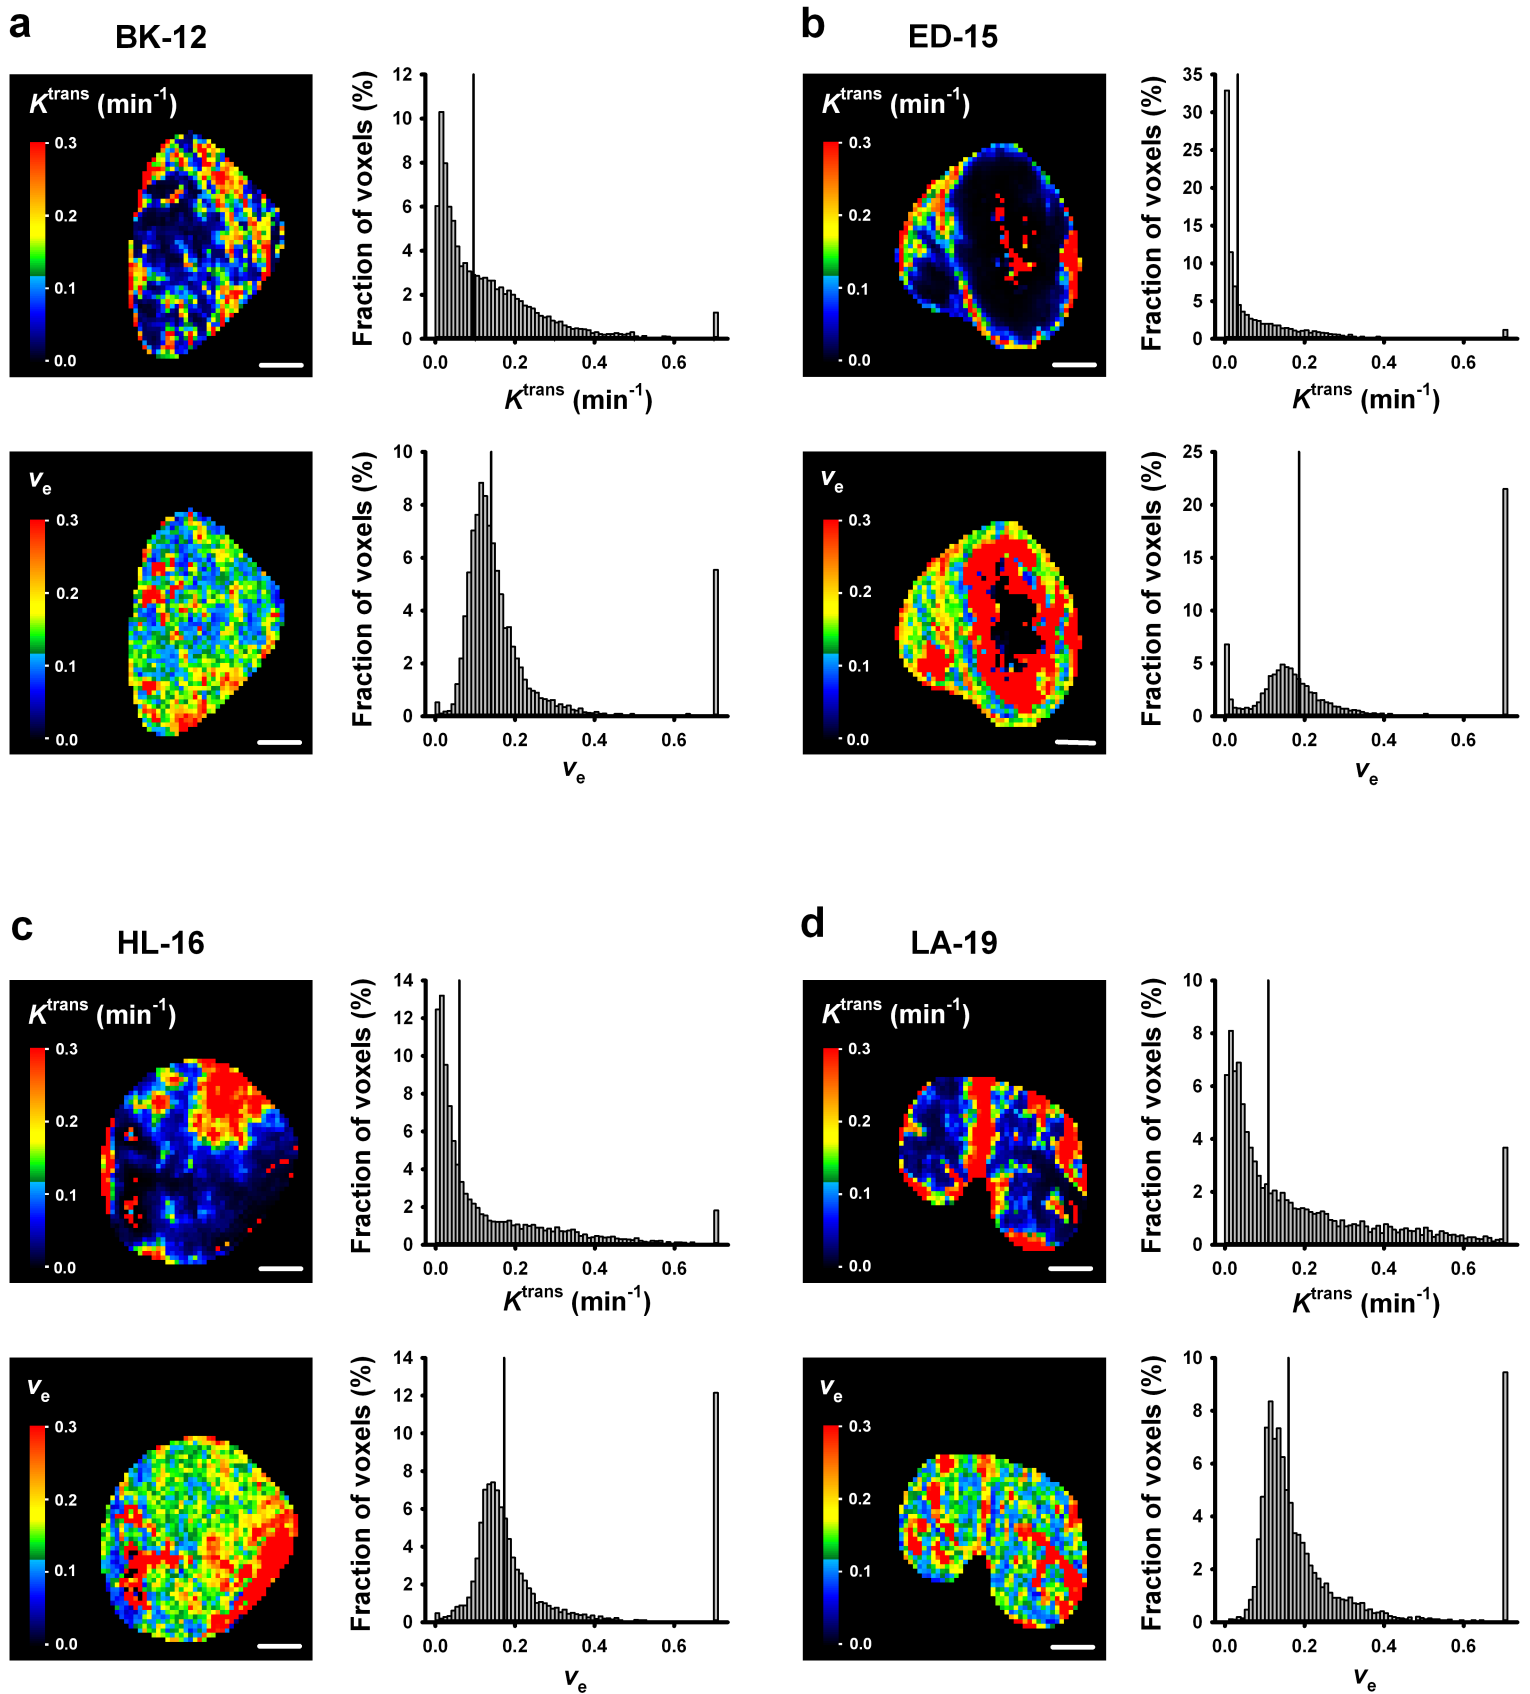

**Figure S1. DCE-MRI parameter maps and frequency distributions prior to exclusion of unphysiological voxels.**  $K^{\text{trans}}$  and  $v_e$  images and frequency distributions of a representative BK-12 (a), ED-15 (b), HL-16 (c), and LA-19 (d) tumor. A central axial tumor section is shown in the parametric images, while individual voxel values from all tumor sections are included in the frequency distributions. Tumor median values are indicated by vertical lines. Color bars:  $K^{\text{trans}}$  or  $v_e$  scales. Scale bars: 2 mm.
